# Supplementary material for: LUF7244, an allosteric modulator/activator of Kv11.1 channels, counteracts dofetilide‐induced torsades de pointes arrhythmia in the chronic atrioventricular block dog model
Source: PubMed Central journal article supplement (PMC6780032; doi:10.1111/bph.14798), 2019-08-30
Supplement: BPH-176-3871-s001.pdf [file BPH-176-3871-s001.pdf]

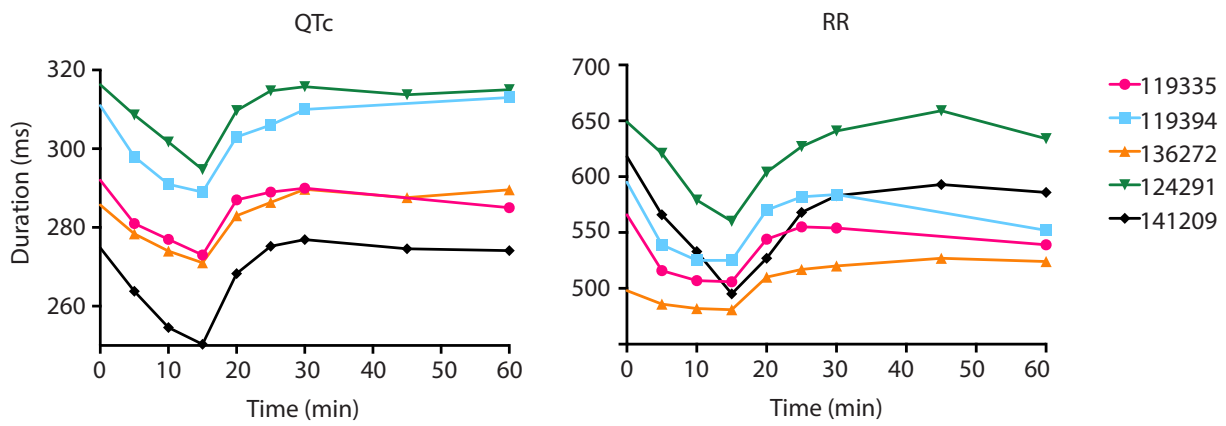

Supplemental Figure S1

QTc (left panel) and RR (right panel) interval in individual SR dogs receiving LUF7244 (2.5 mg.kg<sup>-1</sup>.15min<sup>-1</sup>, 0-15 min) and washout (15-60 min). Dog identification numbers are indicated on the right.
