# Supplementary material for: LUF7244, an allosteric modulator/activator of Kv11.1 channels, counteracts dofetilide‐induced torsades de pointes arrhythmia in the chronic atrioventricular block dog model
Source: PubMed Central journal article supplement (PMC6780032; doi:10.1111/bph.14798), 2019-08-30
Supplement: BPH-176-3871-s002.pdf [file BPH-176-3871-s002.pdf]

## Supplemental Table S1

Characteristics of dogs (n=10) involved in *in vivo* experiment.

| <b>Sinus Rhythm experiment</b> |                         |            |                   |               |
|--------------------------------|-------------------------|------------|-------------------|---------------|
| <b>No.</b>                     | <b>Type</b>             | <b>sex</b> | <b>Dog number</b> | <b>weight</b> |
| 1                              | SR                      | m          | 119335            | 25 kg         |
| 2                              | SR                      | m          | 119394            | 27 kg         |
| 3                              | SR                      | f          | 124291            | 20 kg         |
| 4                              | SR                      | f          | 136272            | 19 kg         |
| 5                              | SR                      | f          | 141209            | 23 kg         |
| <b>Inducibility experiment</b> |                         |            |                   |               |
| <b>No.</b>                     | <b>Type<sup>a</sup></b> | <b>sex</b> | <b>Dog number</b> | <b>weight</b> |
| 1                              | CAVB2                   | m          | 119335            | 26 kg         |
| 2                              | CAVB2                   | m          | 119394            | 26 kg         |
| 6                              | CAVB2                   | m          | 118860            | 27 kg         |
| 7                              | CAVB2                   | m          | 118487            | 26 kg         |
| 8                              | CAVB2                   | m          | 118479            | 29 kg         |
| 9                              | CAVB2                   | m          | 119840            | 27 kg         |
| 10                             | CAVB2                   | f          | 133702            | 20 kg         |
| <b>Prevention experiment</b>   |                         |            |                   |               |
| <b>No.</b>                     | <b>Type<sup>a</sup></b> | <b>sex</b> | <b>Dog number</b> | <b>weight</b> |
| 1                              | CAVB4                   | m          | 119335            | 25 kg         |
| 2                              | CAVB5                   | m          | 119394            | 26 kg         |
| 6                              | CAVB6                   | m          | 118860            | 29 kg         |
| 7                              | CAVB6                   | m          | 118487            | 27 kg         |
| 8                              | CAVB5                   | m          | 118479            | 28 kg         |
| 9                              | CAVB4                   | m          | 119840            | 27 kg         |
| 10                             | CAVB4                   | f          | 133702            | 20 kg         |

<sup>a</sup> number indicates weeks of CAVB
