# Supplementary material for: LUF7244, an allosteric modulator/activator of Kv11.1 channels, counteracts dofetilide‐induced torsades de pointes arrhythmia in the chronic atrioventricular block dog model
Source: PubMed Central journal article supplement (PMC6780032; doi:10.1111/bph.14798), 2019-08-30
Supplement: BPH-176-3871-s003.pdf [file BPH-176-3871-s003.pdf]

Supplemental table 2. Drug history and background information of dogs involved in CMCs isolation (n=44)

| Type                | N  | Sex    | Dog number | Isolation date | Drug 1                               | Drug 2                                | Drug 3                           | Drug 4                         | Drug 5                          | Drugs received in isolation day* | Interventions                                                               |
|---------------------|----|--------|------------|----------------|--------------------------------------|---------------------------------------|----------------------------------|--------------------------------|---------------------------------|----------------------------------|-----------------------------------------------------------------------------|
| Retrievers          | 1  | F      | 96337      | 28/12/2015     | doxitilide 0.025mg/kg/5min (4 times) | -                                     | -                                | -                              | -                               | dobutamine 0.025mg/kg/5min       | last exp. CRTX, 48 days; VV60-CRT; multiphasic EGM IV and MAPs; non-suscept |
|                     | 2  | F      | 94840      | 23/11/2015     | doxitilide 0.025mg/kg/5min (4 times) | -                                     | -                                | -                              | -                               | dobutamine 0.025mg/kg/5min       | last exp. CRTX, 52 days; VV60-CRT; multiphasic EGM IV and MAPs; suscept     |
|                     | 3  | F      | 96349      | 30/12/2015     | doxitilide 0.025mg/kg/5min (3 times) | -                                     | -                                | -                              | -                               | dobutamine 0.025mg/kg/5min       | last exp. CRTX, 53 days; VV60-CRT; multiphasic EGM IV and MAPs; suscept     |
|                     | 4  | F      | 94842      | 02/12/2015     | doxitilide 0.025mg/kg/5min (3 times) | -                                     | -                                | -                              | -                               | dobutamine 0.025mg/kg/5min       | last exp. CRTX, 55 days; VV60-CRT; multiphasic EGM IV and MAPs; non-suscept |
|                     | 5  | F      | 96847      | 14/01/2016     | doxitilide 0.025mg/kg/5min (2 times) | Hexamethonium 20mg/kg/5min(4 times)   | -                                | -                              | -                               | dobutamine 0.025mg/kg/5min       | Hexamethonium 20mg/kg/5min                                                  |
|                     | 6  | F      | 95182      | 27/01/2016     | doxitilide 0.025mg/kg/5min (3 times) | Hexamethonium 20mg/kg/5min(4 times)   | -                                | -                              | -                               | dobutamine 0.025mg/kg/5min       | Hexamethonium 20mg/kg/5min                                                  |
|                     | 7  | F      | 97257      | 06/02/2016     | doxitilide 0.025mg/kg/5min (3 times) | Hexamethonium 20mg/kg/5min(4 times)   | -                                | -                              | -                               | dobutamine 0.025mg/kg/5min       | Hexamethonium 20mg/kg/5min                                                  |
|                     | 8  | M      | 99278      | 20/09/2016     | doxitilide 0.025mg/kg/5min (3 times) | -                                     | -                                | -                              | -                               | dobutamine 0.025mg/kg/5min       | -                                                                           |
|                     | 9  | M      | 99206      | 27/09/2016     | doxitilide 0.025mg/kg/5min (3 times) | -                                     | -                                | -                              | -                               | dobutamine 0.025mg/kg/5min       | -                                                                           |
|                     | 10 | F      | 10042      | 03/10/2016     | doxitilide 0.025mg/kg/5min (3 times) | -                                     | -                                | -                              | -                               | dobutamine 0.025mg/kg/5min       | -                                                                           |
|                     | 11 | M      | 118479     | 06/10/2017     | doxitilide 0.025mg/kg/5min (4 times) | isocarazone, 3ug/kg/min for 3h (once) | isocarazone, 30ug/kg/5min (once) | LUF244, 2.5mg/kg/5min (once)   | Flunarizine 1mg/kg/2min (twice) | dobutamine 0.025mg/kg/5min       | last exp. RW48, VV60, test non-suscept; RWMAP+LV5GM                         |
|                     | 12 | M      | 118487     | 06/10/2017     | doxitilide 0.025mg/kg/5min (5 times) | isocarazone, 3ug/kg/min for 3h (once) | isocarazone, 30ug/kg/5min (once) | LUF244, 2.5mg/kg/5min (twice)  | Flunarizine 1mg/kg/2min (twice) | dobutamine 0.025mg/kg/5min       | last exp. RW48, VV60, test non-suscept; RWMAP+LV5GM                         |
|                     | 13 | M      | 118840     | 05/09/2017     | doxitilide 0.025mg/kg/5min (4 times) | sertindole 2mg/kg/5min (twice)        | -                                | -                              | -                               | dobutamine 0.025mg/kg/5min       | last exp. RW48, VV60, test non-suscept; RWMAP+LV5GM                         |
|                     | 14 | F      | 118922     | 21/01/2018     | doxitilide 0.025mg/kg/5min (4 times) | sertindole 2 days, 2 mg/kg/day*       | -                                | -                              | -                               | dobutamine 0.025mg/kg/5min       | last exp. RW48, VV60, test non-suscept; RWMAP+LV5GM                         |
|                     | 15 | F      | 13466      | 30/01/2018     | doxitilide 0.025mg/kg/5min (3 times) | ompalidib 7 days, 2 mg/kg/day*        | -                                | -                              | -                               | dobutamine 0.025mg/kg/5min       | last exp. RW48, VV60, test non-suscept; RWMAP+LV5GM                         |
|                     | 16 | F      | 13059      | 15/01/2018     | doxitilide 0.025mg/kg/5min (2 times) | ouabain 0.5ug/kg/min (once)           | Ach 1.5-6ug/kg/min (once)        | isoprenaline 3ug/min (once)    | -                               | dobutamine 0.025mg/kg/5min       | last exp. RW48, VV60, test non-suscept; RWMAP+LV5GM                         |
|                     | 17 | F      | 13975      | 19/06/2018     | doxitilide 0.025mg/kg/5min (2 times) | ouabain 0.5ug/kg/min (once)           | Ach 1.5-6ug/kg/min (twice)       | isoprenaline 3ug/min (3 times) | -                               | dobutamine 0.025mg/kg/5min       | last exp. RW48, VV60, test non-suscept; RWMAP+LV5GM                         |
| Labrador Retrievers | 18 | M      | 16887      | 15/04/2019     | doxitilide 0.025mg/kg/5min (2 times) | -                                     | -                                | -                              | -                               | dobutamine 0.025mg/kg/5min       | last exp. CRTX, ECHO, test suscept; VV60-CRT; LV5GM+RWMAP                   |
|                     | 19 | M      | 167917     | 29/04/2019     | doxitilide 0.025mg/kg/5min (2 times) | -                                     | -                                | -                              | -                               | dobutamine 0.025mg/kg/5min       | last exp. RW48, ECHO, test non-suscept; VV60-CRT; LV5GM+RWMAP               |
|                     | 20 | M      | 168442     | 14/05/2019     | doxitilide 0.025mg/kg/5min (3 times) | -                                     | -                                | -                              | -                               | dobutamine 0.025mg/kg/5min       | last exp. RW48, ECHO, test non-suscept; VV60-CRT; LV5GM+RWMAP               |
|                     | 21 | F      | 168561     | 21/05/2019     | doxitilide 0.025mg/kg/5min (3 times) | -                                     | -                                | -                              | -                               | dobutamine 0.025mg/kg/5min       | last exp. RW48, ECHO, test non-suscept; VV60-CRT; LV5GM+RWMAP               |
|                     | 22 | F      | 168646     | 23/05/2019     | doxitilide 0.025mg/kg/5min (3 times) | -                                     | -                                | -                              | -                               | dobutamine 0.025mg/kg/5min       | last exp. RW48, ECHO, test non-suscept; VV60-CRT; LV5GM+RWMAP               |
|                     | 23 | M      | -          | 16/03/2016     | -                                    | -                                     | -                                | -                              | -                               | -                                | Wilfridsearch Pharmacokinetics                                              |
|                     | 24 | M      | -          | 21/03/2016     | -                                    | -                                     | -                                | -                              | -                               | -                                | Wilfridsearch Pharmacokinetics                                              |
|                     | 25 | M      | -          | 01/03/2016     | -                                    | -                                     | -                                | -                              | -                               | -                                | Wilfridsearch Pharmacokinetics                                              |
|                     | 26 | M      | -          | 06/03/2016     | -                                    | -                                     | -                                | -                              | -                               | -                                | Wilfridsearch Pharmacokinetics                                              |
|                     | 27 | F      | -          | 15/03/2016     | -                                    | -                                     | -                                | -                              | -                               | -                                | Wilfridsearch Pharmacokinetics                                              |
| 28                  | F  | -      | 22/03/2016 | -              | -                                    | -                                     | -                                | -                              | -                               | Wilfridsearch Pharmacokinetics   |                                                                             |
| 29                  | M  | Beagle | 23/05/2016 | -              | -                                    | -                                     | -                                | -                              | -                               | Education only                   |                                                                             |
| 30                  | M  | Beagle | 25/05/2016 | -              | -                                    | -                                     | -                                | -                              | -                               | Wilfridsearch Pharmacokinetics   |                                                                             |
| 31                  | M  | -      | 12/07/2016 | -              | -                                    | -                                     | -                                | -                              | -                               | Wilfridsearch Pharmacokinetics   |                                                                             |
| 32                  | M  | -      | 19/07/2016 | -              | -                                    | -                                     | -                                | -                              | -                               | Wilfridsearch Pharmacokinetics   |                                                                             |
| 33                  | M  | -      | 25/07/2016 | -              | -                                    | -                                     | -                                | -                              | -                               | Wilfridsearch Pharmacokinetics   |                                                                             |
| 34                  | M  | -      | 02/08/2016 | -              | -                                    | -                                     | -                                | -                              | -                               | Wilfridsearch Pharmacokinetics   |                                                                             |
| 35                  | M  | -      | 09/08/2016 | -              | -                                    | -                                     | -                                | -                              | -                               | Wilfridsearch Pharmacokinetics   |                                                                             |
| 36                  | F  | -      | 19/12/2017 | -              | -                                    | -                                     | -                                | -                              | -                               | Charles River Pharmacokinetics   |                                                                             |
| 37                  | F  | -      | 16/01/2018 | -              | -                                    | -                                     | -                                | -                              | -                               | Charles River Pharmacokinetics   |                                                                             |
| 38                  | F  | -      | 06/03/2018 | -              | -                                    | -                                     | -                                | -                              | -                               | Charles River Pharmacokinetics   |                                                                             |
| 39                  | F  | -      | 11/03/2018 | -              | -                                    | -                                     | -                                | -                              | -                               | Charles River Pharmacokinetics   |                                                                             |
| 40                  | F  | -      | 18/03/2018 | -              | -                                    | -                                     | -                                | -                              | -                               | Isaie operation                  |                                                                             |
| Mastiffs            | 41 | M      | 167921     | 14/01/2019     | doxitilide 0.025mg/kg/5min (2 times) | ompalidib 7 days, 2 mg/kg/day*        | -                                | -                              | -                               | dobutamine 0.025mg/kg/5min       | last exp. RW48, VV60, test non-suscept; RWMAP+LV5GM, RWMAP, day 7 GM        |
|                     | 42 | F      | 167942     | 15/03/2019     | doxitilide 0.025mg/kg/5min (2 times) | ompalidib 7 days, 2 mg/kg/day*        | -                                | -                              | -                               | dobutamine 0.025mg/kg/5min       | last exp. RW48, VV60, test non-suscept; RWMAP+LV5GM, RWMAP, day 7 GM        |
|                     | 43 | M      | 167995     | 26/03/2019     | doxitilide 0.025mg/kg/5min (2 times) | ompalidib 7 days, 2 mg/kg/day*        | -                                | -                              | -                               | dobutamine 0.025mg/kg/5min       | last exp. RW48, VV60, test non-suscept; RWMAP+LV5GM, RWMAP, day 7 GM        |
|                     | 44 | M      | 168211     | 03/04/2019     | doxitilide 0.025mg/kg/5min (2 times) | ompalidib 7 days, 2 mg/kg/day*        | -                                | -                              | -                               | dobutamine 0.025mg/kg/5min       | last exp. RW48, VV60, test non-suscept; RWMAP+LV5GM, RWMAP, day 7 GM        |
