# Supplementary material for: LUF7244, an allosteric modulator/activator of Kv11.1 channels, counteracts dofetilide‐induced torsades de pointes arrhythmia in the chronic atrioventricular block dog model
Source: PubMed Central journal article supplement (PMC6780032; doi:10.1111/bph.14798), 2019-08-30
Supplement: BPH-176-3871-s004.pdf [file BPH-176-3871-s004.pdf]

**Supplemental Table S3**

**QTc interval and plasma concentration from individual dogs involved in Inducibility and Prevention experiment (n=7)**

| Dog number       |                           | Inducibility experiment |                             | Prevention experiment |                    |                                     |                              |                     |                     |      |
|------------------|---------------------------|-------------------------|-----------------------------|-----------------------|--------------------|-------------------------------------|------------------------------|---------------------|---------------------|------|
|                  |                           | Baseline-QTc<br>(0 min) | Dofetilide-QTc<br>(3.9 min) | QTc (ms) <sup>c</sup> |                    |                                     | Plasma concentration (ng/mL) |                     |                     | AS   |
|                  |                           |                         |                             | Baseline<br>(0 min)   | LUF7244<br>(5 min) | LUF7244<br>+Dofetilide<br>(8.9 min) | Baseline<br>(0 min)          | LUF7244<br>(15 min) | washout<br>(30 min) |      |
| Inducible        | <b>119335</b>             | 334±2                   | 456±11                      | 336±4                 | 328±7              | 567±3                               | 10                           | 1133                | 0                   | 1    |
|                  | <b>118487</b>             | 333±1                   | 543±13                      | 325±2                 | 325±2              | 566±8                               | 0                            | 1353                | 0                   | 3    |
|                  | <b>118860<sup>b</sup></b> | 471±2                   | 616±4                       | 449±3                 | 435±3              | 665±7                               | 0                            | 693                 | 0                   | 2    |
|                  | <b>118479</b>             | 438±3                   | 444±8                       | 455±9                 | 444±3              | 608±2                               | 0                            | 654                 | 0                   | 2    |
|                  | <b>133702</b>             | 433±6                   | 524±8                       | 319±8                 | 315±6              | 467±16                              | 0                            | 1734                | 17                  | 1    |
| N-I <sup>a</sup> | <b>119394</b>             | 420±4                   | 480±43                      | 363±2                 | 372±5              | 536±7                               | 0                            | 312                 | 0                   | 50   |
|                  | <b>119840</b>             | 445±5                   | 540±6                       | 433±2                 | 416±4              | 520±18                              | 0                            | 120                 | 0                   | 58.3 |

<sup>a</sup> Non-Inducible dog

<sup>b</sup> dog 118860 was paced at VVI60, so only QT is shown

<sup>c</sup> Van de Water QTc = QT-0.087(RR-1000)

values are represented as mean ± SD. AS indicates arrhythmia score
